# Supplementary material
Source: PubMed Central journal article supplement (PMC5811101)
Supplement: SC-006-C4SC02982H-s001.pdf [file SC-006-C4SC02982H-s001.pdf]

# Nuclear resonance vibrational spectroscopy reveals the FeS cluster composition and active site vibrational properties of an O<sub>2</sub>-tolerant NAD<sup>+</sup>-reducing [NiFe] hydrogenase

Lars Lauterbach,<sup>1,2,\*</sup> Hongxin Wang,<sup>2,3,†</sup> Marius Horch,<sup>1,‡</sup> Leland B. Gee,<sup>2</sup> Yoshitaka Yoda,<sup>4</sup> Yoshihito Tanaka,<sup>5</sup> Ingo Zebger,<sup>1</sup> Oliver Lenz,<sup>1</sup> Stephen P. Cramer<sup>2,3,\*</sup>

<sup>1</sup> Institute of Chemistry, Technische Universität Berlin, Straße des 17. Juni 135, 10623 Berlin, Germany; <sup>2</sup> Department of Chemistry, University of California, One Shields Ave, Davis CA 95616, USA; <sup>3</sup> Physical Biosciences Division, Lawrence Berkeley National Laboratory, One Cyclotron Road, Berkeley CA 94720, USA; <sup>4</sup> JASRI, SPring-8, 1-1-1 Kouto, Mikazuki-cho, Sayo-gun, Hyogo 679-5198, Japan; <sup>5</sup> RIKEN, SPring-8, 1-1-1 Kouto, Mikazuki-cho, Sayo-gun, Hyogo 679-5198, Japan

## Supplementary Data

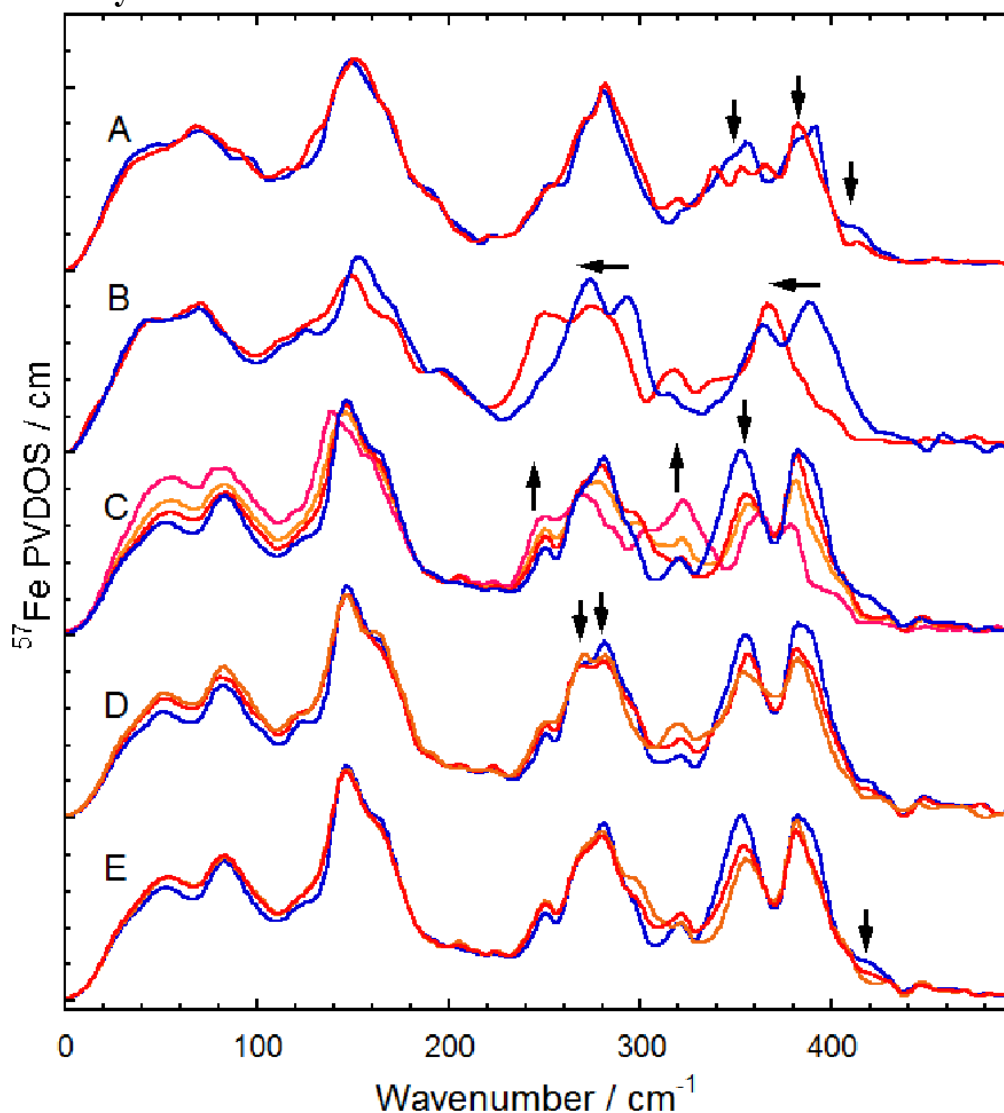

Figure S1. Comparison of weighted sum spectra calculated from *Rhodobacter capsulatus* (Rc) [2Fe2S] ferredoxin, *Pyrococcus furiosus* (Pf) [4Fe4S] ferredoxin, and *Pyrococcus furiosus* [3Fe4S] ferredoxin (Pf) with the NRVS of the NAD<sup>+</sup>-reducing hydrogenase (SH) and *Desulfovibrio vulgaris* (Dv) Miyazaki F hydrogenase .

19 A: Oxidized (blue) and NADH-reduced (red) SH.  
 20 B: Oxidized (blue) and reduced (red) *Dv* hydrogenase.  
 21 C: Influence of the number of reduced [4Fe4S] clusters on the weighted sum spectrum: (Blue)  
 22 One oxidized [2Fe2S] *Rc* ferredoxin plus four oxidized [4Fe4S] *Pf* ferredoxin. (Red) One  
 23 reduced [2Fe2S] *Rc* ferredoxin plus three oxidized and one reduced [4Fe4S] *Pf* ferredoxin.  
 24 (Orange) One reduced [2Fe2S] *Rc* ferredoxin plus two oxidized and two reduced [4Fe4S] of *Pf*  
 25 ferredoxin. (Purple) One reduced [2Fe2S] *Rc* ferredoxin plus four reduced [4Fe4S] *Pf* ferredoxin.  
 26 D: Influence of a [3Fe4S] cluster on the weighted sum spectrum: (Blue) One oxidized [2Fe2S]  
 27 *Rc* ferredoxin plus three oxidized [4Fe4S] ferredoxin and one oxidized [3Fe4S] *Pf* ferredoxin.  
 28 (Red) One reduced [2Fe2S] *Rc* ferredoxin plus two oxidized and one reduced [4Fe4S] ferredoxin  
 29 plus one oxidized [3Fe4S] *Pf* ferredoxin. (Orange) One reduced [2Fe2S] *Rc* ferredoxin plus two  
 30 oxidized and one reduced [4Fe4S] *Pf* ferredoxin plus one reduced [3Fe4S] *Pf* ferredoxin.  
 31 E: Influence of the redox state of [2Fe2S] *Rc* ferredoxin on the weighted sum spectrum: (Blue)  
 32 one oxidized [2Fe2S] *Rc* ferredoxin plus four oxidized [4Fe4S] *Pf* ferredoxin. (Red) 1/2 reduced  
 33 [2Fe2S] *Rc* ferredoxin plus 1/2 oxidized [2Fe2S] *Rc* ferredoxin plus four oxidized [4Fe4S] *Pf*  
 34 ferredoxin. (Orange) One reduced [2Fe2S] *Rc* ferredoxin plus three oxidized and one reduced  
 35 [4Fe4S] *Pf* ferredoxin. Arrows indicate changes between spectra of the same set.  
 36  
 37

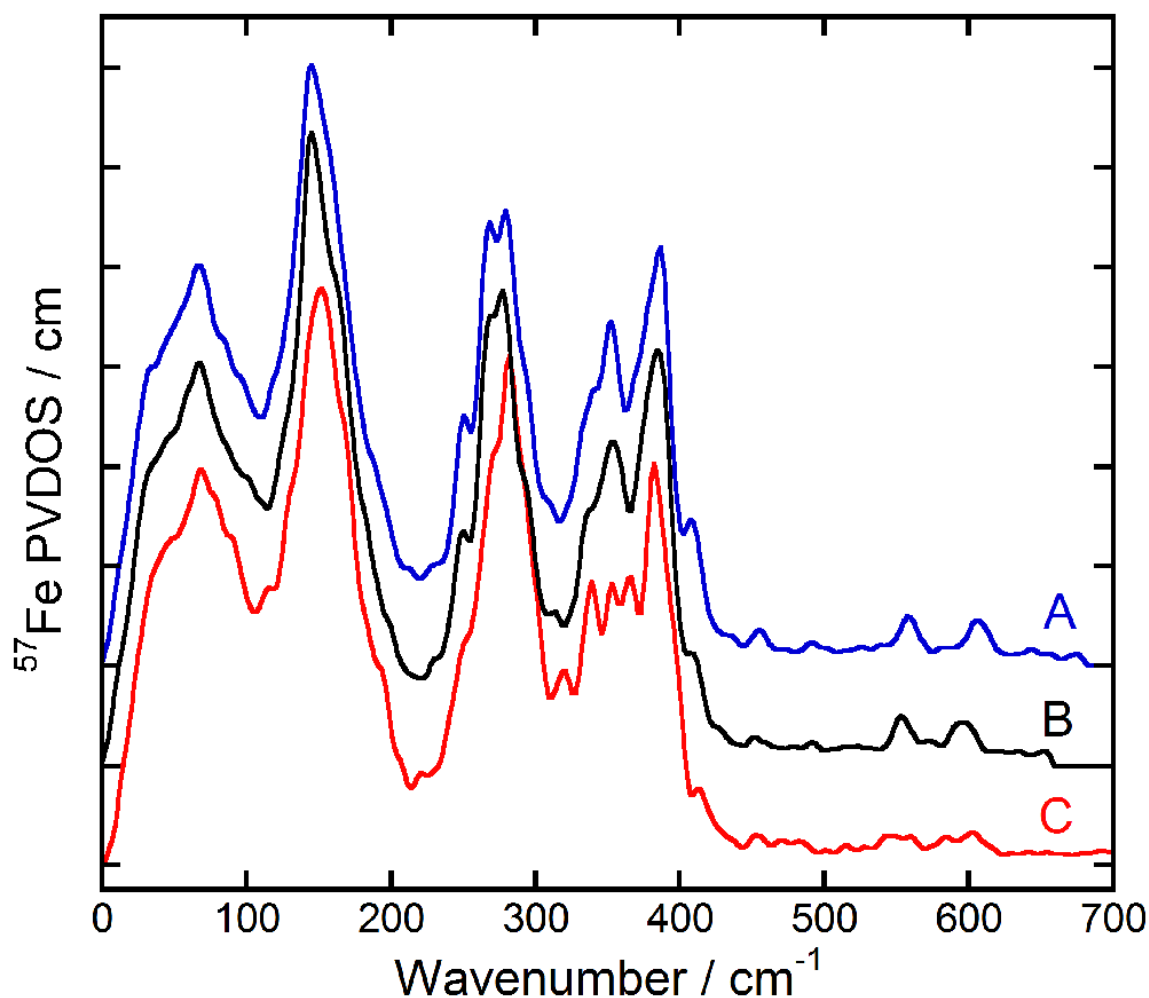

38 Figure S2. Comparison of NRVS for A: as isolated (blue), B:  $^{13}\text{CO}$ -labelled as isolated (black),  
 39 and C: NADH-reduced (red) SH.
